# Supplementary material
Source: ML conference proceedings conference paper supplement (https://aclanthology.org/2021.findings-acl.200)
Supplement: OptionalSupplementaryMaterial [file 2021.findings-acl.200.OptionalSupplementaryMaterial.pdf]

# 1 Case Study

|           |                                                                                                                                                                                                                |
|-----------|----------------------------------------------------------------------------------------------------------------------------------------------------------------------------------------------------------------|
| Input     | [Athens International Airport, city Served, Athens]<br>[Athens, country, Greece]<br>[Greece, leader Name, Alexis Tsipras]<br>[Greece, language, Greek language]<br>[Greece, leader Name, Prokopis Pavlopoulos] |
| KGPT-Seq  | Athens International Airport serves the city of Athens, Greece. The country's leaders are Alexis Tsipras and Prokopis Pavlopoulos. Greek is the language spoken there.                                         |
| Bart-base | Athens International Airport serves the city of Athens in Greece. Two of the leaders of which Alexis Tsipras and Prokopis Pavlopoulos. Greek is spoken in that country.                                        |
| STTP      | Athens International Airport serves the city of Athens in Greece. Two of the leaders in greece are Alexis Tsipras and Prokopis. Greek is spoken in the country.                                                |

Table 1: An example of the generated texts by our model and the baselines on WebNLG dataset.
